# Supplementary material
Source: PubMed Central journal article supplement (PMC8551032)
Supplement: NIHMS1735988-supplement-1.pdf [file NIHMS1735988-supplement-1.pdf]

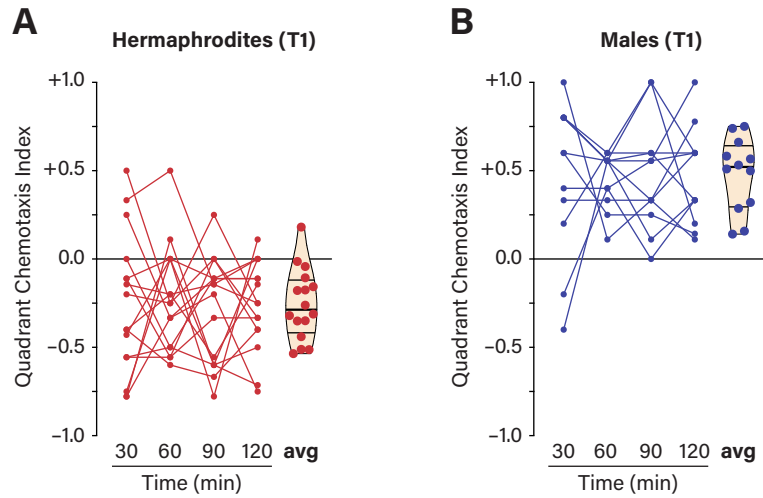

**Figure S1. Behavior at Individual Timepoints in the Quadrant Assay, Related to Figure 1.**

**(A, B)** QCIs for WT hermaphrodites (A) and males (B) in response to  $1.0 \mu\text{M}$  *ascr#3* with T1 food. QCI values from a given assay are connected across timepoints by a line. The violin plot at the right shows average QCI values (the mean of the four timepoints for each assay). These data are taken from Figure 1D.

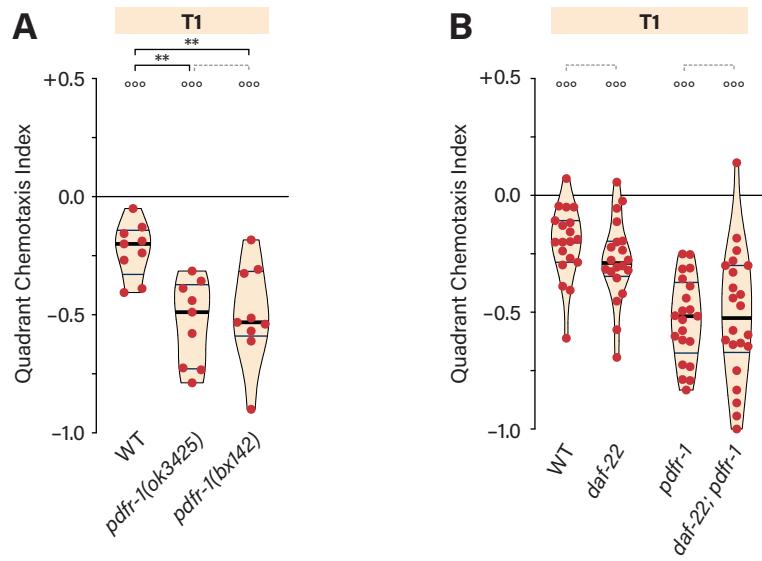

**Figure S2. Behavior of *pdfr-1(ok3425)* and *daf-22* Mutants, Related to Figure 2.**

**(A)** QCIs for WT, *pdfr-1(ok3425)*, and *pdfr-1(bx142)* hermaphrodites with T1 food. **(B)** QCIs for WT, *daf-22*, *pdfr-1*, and *daf-22; pdfr-1* hermaphrodites with T1 food. See legend to Figure 1 for details on statistical analyses.

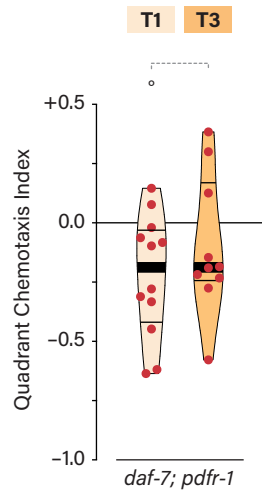

**Figure S3. Behavior of *daf-7; pdf-1* Mutants, Related to Figure 3.**

QCIs for *daf-7; pdf-1* hermaphrodites with T1 and T3 food. See legend to Figure 1 for details on statistical analyses.

| OLIGONUCLEOTIDE SEQUENCE (5'-3')                     | SOURCE | IDENTIFIER           |
|------------------------------------------------------|--------|----------------------|
| GTGATCCTCGTCGAAGTTCG                                 | IDT    | pdfr-1-genotyping-F1 |
| AACGTTACCGTATCCAGCAATG                               | IDT    | pdfr-1-genotyping-F2 |
| TTCCGAAATCTGCTGCACTTAC                               | IDT    | pdfr-1-genotyping-R  |
| GACCTTCGCAGTGA CT CGA                                | IDT    | pdf-1-genotyping-F1  |
| CTCAGGAATAGGAGTGCTCC                                 | IDT    | pdf-1-genotyping-F2  |
| TCAAGGTCTCGCCTCTAGGA                                 | IDT    | pdf-1-genotyping-R   |
| CCGCAGTAGCACATCTCTCA                                 | IDT    | pdf-2-genotyping-F1  |
| CAGATGCGTTACGGCAACTC                                 | IDT    | pdf-2-genotyping-F2  |
| GTTTCGGTGT CACAGGTGAC                                | IDT    | pdf-2-genotyping-R   |
| CATCCGTGTT CGCTGAGAA                                 | IDT    | daf-22-genotyping-F  |
| TGGACTGTGCAGCTCCAG                                   | IDT    | daf-22-genotyping-R  |
| CAATGGACCCAGAAATGAAGTC                               | IDT    | daf-7-genotyping-F   |
| GTTGAATGCTGATACGTTCCGA                               | IDT    | daf-7-genotyping-R   |
| GGGGACAAC TTTGTATAGAAAAGTTGATCTTCAGATGGGAGCAGTGGACTG | IDT    | rab-3p-F             |
| GGGGACTGCTTTTTGTACAAACTTGCTACAGTAGCCCTATTTTCAGATG    | IDT    | rab-3p-R             |
| GGGGACAAC TTTGTATAGAAAAGTTGCCGACAAAACATGAGTATTTCTTT  | IDT    | myo-3p-F             |
| GGGGACTGCTTTTTGTACAAACTTGCCACGACCACTAGATCCATCTAGA    | IDT    | myo-3p-R             |
| GGGGACAAC TTTGTATAGAAAAGTTGTTCTGAAAGTATAAGATTTGACTGA | IDT    | nmr-1p-F             |
| GGGGACTGCTTTTTGTACAAACTTGCGACAAACTTTAGTTTTGTTACAGA   | IDT    | nmr-1p-R             |
| GGGGACAAC TTTGTATAGAAAAGTTGTACAATTGTAGTGAGCTTCGAATTT | IDT    | gcy-28.d-F           |
| GGGGACTGCTTTTTGTACAAACTTGAATGGAATGGTGAGATGAGTGCGAA   | IDT    | gcy-28.d-R           |
| GGGGACAAC TTTGTATAGAAAAGTTGTCCTTAACTTTCTGCTAAAAGTG   | IDT    | mod-1p-F             |
| GGGGACTGCTTTTTGTACAAACTTGGTGCCAATGCGGTGAAAGAAAATT    | IDT    | mod-1p-R             |
| GGGGACAAC TTTGTATAGAAAAGTTGCGGAAATTCAGGTAACCAAAGAAC  | IDT    | tdc-1p-F             |
| GGGGACTGCTTTTTGTACAAACTTGTT CAGGACCGCCAAATGGTTTACG   | IDT    | tdc-1p-R             |
| GGGGACAAC TTTGTATAGAAAAGTTGTCGGAAATGCGGAAGTTCTTTCCGA | IDT    | glr-3p-F             |
| GGGGACTGCTTTTTGTACAAACTTGAATCTTCAATATTTGCTATTAACAT   | IDT    | glr-3p-R             |
| GGGGACAAC TTTGTATAGAAAAGTTGAATGGAAGACGAGAGACAGTTGG   | IDT    | osm-6p-F             |
| GGGGACTGCTTTTTGTACAAACTTGCTATTACCTTCATTAGTATACATCT   | IDT    | osm-6p-R             |

**Table S1. Oligonucleotide Primers Used in This Work, Related to STAR Methods.**
